# Supplementary material
Source: publisher site journal article supplement (https://www.dovepress.com/article/316429)
Supplement: Supplementary file 1 [file get_supplementary_file.php]

**Table S1**. PRISMA checklist

| **Section/topic** | **#** | **Checklist item** | **Reported on page #** |
| --- | --- | --- | --- |
| **TITLE** | | |  |
| Title | 1 | Identify the report as a systematic review, meta-analysis, or both. | 1 |
| **ABSTRACT** | | |  |
| Structured summary | 2 | Provide a structured summary including, as applicable: background; objectives; data sources; study eligibility criteria, participants, and interventions; study appraisal and synthesis methods; results; limitations; conclusions and implications of key findings; systematic review registration number. | 1-2 |
| **INTRODUCTION** | | |  |
| Rationale | 3 | Describe the rationale for the review in the context of what is already known. | 2 |
| Objectives | 4 | Provide an explicit statement of questions being addressed with reference to participants, interventions, comparisons, outcomes, and study design (PICOS). | 4 |
| **METHODS** | | |  |
| Protocol and registration | 5 | Indicate if a review protocol exists, if and where it can be accessed (e.g., Web address), and, if available, provide registration information including registration number. | - |
| Eligibility criteria | 6 | Specify study characteristics (e.g., PICOS, length of follow-up) and report characteristics (e.g., years considered, language, publication status) used as criteria for eligibility, giving rationale. | 4 |
| Information sources | 7 | Describe all information sources (e.g., databases with dates of coverage, contact with study authors to identify additional studies) in the search and date last searched. | 4-5 |
| Search | 8 | Present full electronic search strategy for at least one database, including any limits used, such that it could be repeated. | 4 |
| Study selection | 9 | State the process for selecting studies (i.e., screening, eligibility, included in systematic review, and, if applicable, included in the meta-analysis). | 5 |
| Data collection process | 10 | Describe method of data extraction from reports (e.g., piloted forms, independently, in duplicate) and any processes for obtaining and confirming data from investigators. | 5 |
| Data items | 11 | List and define all variables for which data were sought (e.g., PICOS, funding sources) and any assumptions and simplifications made. | 5 |
| Risk of bias in individual studies | 12 | Describe methods used for assessing risk of bias of individual studies (including specification of whether this was done at the study or outcome level), and how this information is to be used in any data synthesis. | 5 |
| Summary measures | 13 | State the principal summary measures (e.g., risk ratio, difference in means). | 6-11 |
| Synthesis of results | 14 | Describe the methods of handling data and combining results of studies, if done, including measures of consistency (e.g., I2) for each meta-analysis. | - |

Page 1 of 2

| **Section/topic** | **#** | **Checklist item** | **Reported on page #** |
| --- | --- | --- | --- |
| Risk of bias across studies | 15 | Specify any assessment of risk of bias that may affect the cumulative evidence (e.g., publication bias, selective reporting within studies). | - |
| Additional analyses | 16 | Describe methods of additional analyses (e.g., sensitivity or subgroup analyses, meta-regression), if done, indicating which were pre-specified. | - |
| **RESULTS** | | |  |
| Study selection | 17 | Give numbers of studies screened, assessed for eligibility, and included in the review, with reasons for exclusions at each stage, ideally with a flow diagram. | 5-11 |
| Study characteristics | 18 | For each study, present characteristics for which data were extracted (e.g., study size, PICOS, follow-up period) and provide the citations. | 6-7 |
| Risk of bias within studies | 19 | Present data on risk of bias of each study and, if available, any outcome level assessment (see item 12). | 6 |
| Results of individual studies | 20 | For all outcomes considered (benefits or harms), present, for each study: (a) simple summary data for each intervention group (b) effect estimates and confidence intervals, ideally with a forest plot. | 6-11 |
| Synthesis of results | 21 | Present results of each meta-analysis done, including confidence intervals and measures of consistency. | - |
| Risk of bias across studies | 22 | Present results of any assessment of risk of bias across studies (see Item 15). | - |
| Additional analysis | 23 | Give results of additional analyses, if done (e.g., sensitivity or subgroup analyses, meta-regression [see Item 16]). | - |
| **DISCUSSION** | | |  |
| Summary of evidence | 24 | Summarize the main findings including the strength of evidence for each main outcome; consider their relevance to key groups (e.g., healthcare providers, users, and policy makers). | 11-14 |
| Limitations | 25 | Discuss limitations at study and outcome level (e.g., risk of bias), and at review-level (e.g., incomplete retrieval of identified research, reporting bias). | 15 |
| Conclusions | 26 | Provide a general interpretation of the results in the context of other evidence, and implications for future research. | 15 |
| **FUNDING** | | |  |
| Funding | 27 | Describe sources of funding for the systematic review and other support (e.g., supply of data); role of funders for the systematic review. | 15 |

*From:*  Moher D, Liberati A, Tetzlaff J, Altman DG, The PRISMA Group (2009). Preferred Reporting Items for Systematic Reviews and Meta-Analyses: The PRISMA Statement. PLoS Med 6(7): e1000097. doi:10.1371/journal.pmed1000097

For more information, visit: **www.prisma-statement.org**.

Page 2 of 2

**Table S2.** Search strings used in each database

| Database | Search strategy |
| --- | --- |
| PubMed | (osteoporosis OR bone OR fracture OR "X-ray absorptiometry") AND ("air pollution" OR "particulate matter" OR PM2.5 OR PM10), search all field, 01/01/1990-31/12/2021 |
| Web of Sciences | (osteoporosis OR bone OR fracture OR "X-ray absorptiometry") AND ("air pollution" OR "particulate matter" OR PM2.5 OR PM10), search all field, English language, article only, 1990-2021 |
| Scopus | TITLE-ABS-KEY ((osteoporosis OR bone OR fracture OR "X-ray absorptiometry") AND ("air pollution" OR "particulate matter" OR PM2.5 OR PM10)) AND DOCTYPE (ar) AND PUBYEAR > 1989 AND (LIMIT-TO (SUBJAREA, "MEDI") OR LIMIT-TO (SUBJAREA, "BIOC") OR LIMIT-TO (SUBJAREA, "PHAR") OR LIMIT-TO (SUBJAREA, "AGRI" ) OR LIMIT-TO (SUBJAREA, "IMMU") OR LIMIT-TO (SUBJAREA , "DENT") OR LIMIT-TO (SUBJAREA, "NEUR") OR LIMIT-TO (SUBJAREA, "HEAL") OR LIMIT-TO (SUBJAREA, "VETE") OR LIMIT-TO (SUBJAREA, "NURS")); search title, abstract, keywords, article only, health and medical-related subject areas, 1990-2021 |
| Google scholar | allintitle: (("air pollution" OR "particulate matter" OR PM2.5 OR PM10) AND (osteoporosis OR bone OR fracture OR "x ray absorptiometry")), 1990-2021 |
| Cochrane Library | (osteoporosis OR bone OR fracture OR "X-ray absorptiometry") AND ("air pollution" OR "particulate matter" OR PM2.5 OR PM10)" with Cochrane Library publication date between Jan 1990 and Dec 2021 |

**Table S3**: JBI Critical Appraisal Checklist for analytical cross-sectional studies

| **No.** | **JBI Critical Appraisal Checklist for analytical cross-sectional studies** | **Included cross-sectional studies** | | | | | | | | |
| --- | --- | --- | --- | --- | --- | --- | --- | --- | --- | --- |
| 81 | 82 | 83 | 84 | 85 | 86 | 87 | 88 | 89 |
| 1 | Were the criteria for inclusion in the sample clearly defined? | Y | Y | Y | Y | Y | Y | Y | Y | Y |
| 2 | Were the study subjects and the setting described in detail? | Y | Y | Y | Y | Y | Y | Y | Y | Y |
| 3 | Was the exposure measured in a valid and reliable way? | Y | Y | Y | Y | Y | Y | Y | Y | Y |
| 4 | Were objective, standard criteria used for measurement of the condition? | Y | Y | Y | Y | Y | Y | Y | Y | Y |
| 5 | Were confounding factors identified? | Y | Y | N | Y | Y | Y | Y | Y | Y |
| 6 | Were strategies to deal with confounding factors stated? | Y | Y | N | Y | Y | Y | Y | Y | Y |
| 7 | Were the outcomes measured in a valid and reliable way? | N* | N ** | Y | Y | Y | N# | N# | Y | Y |
| 8 | Was appropriate statistical analysis used? | Y | Y | Y | Y | Y | Y | Y | Y | Y |
| **Score** | | 8/8 | 7/8 | 6/8 | 8/8 | 8/8 | 7/8 | 7/8 | 8/8 | 8/8 |
| **Overall appraisal (/: included, X: excluded)** | | / | / | / | / | / | / | / | / | / |

**Notes:**

* The measurement of total body BMD and low BMD definition were inappropriate

** self-reported forearm fractures are considered not reliable under JBI critical appraisal checklist

# Inappropriate osteoporosis definition by using foot and QUS bone health measurement. Besides, the QUS measurement was conducted without DXA validation

Adapted from JBI. Critical appraisal tools; 2020. Available from: https://jbi.global/critical-appraisal-tools. Accessed February 18, 2021. Moola S, Munn Z, Tufanaru C, Aromataris E, Sears K, Sfetcu R, Currie M, Qureshi R, Mattis P, Lisy K, Mu P-F. Chapter 7: Systematic reviews of etiology and risk. In: Aromataris E, Munn Z (Editors). JBI Manual for Evidence Synthesis. JBI, 2020. Available from https://synthesismanual.jbi.global. © JBI, 2020. All rights reserved.

**Abbreviations**: Y= Yes, N= No, NA= not applicable

**Table S4**: JBI Critical Appraisal Checklist for cohort studies

| **No.** | **JBI Critical Appraisal Checklist for cohort studies** | **Included cohort studies** | | | | | |
| --- | --- | --- | --- | --- | --- | --- | --- |
| 90 | 91 | 92 | 93 # | 93 ## | 94 |
| 1 | Were the two groups similar and recruited from the same population? | Y | Y | Y | Y | Y | Y |
| 2 | Were the exposures measured similarly to assign people to both exposed and unexposed groups? | Y | Y | Y | Y | Y | Y |
| 3 | Was the exposure measured in a valid and reliable way? | Y | Y | Y | Y | Y | Y |
| 4 | Were confounding factors identified? | Y | N | Y | Y | Y | Y |
| 5 | Were strategies to deal with confounding factors stated? | Y | N | Y | Y | Y | Y |
| 6 | Were the groups/participants free of the outcome at the start of the study (or at the moment of exposure)? | Y | Y | Y | Y | Y | Y |
| 7 | Were the outcomes measured in a valid and reliable way? | Y | Y | Y | Y | Y | N** |
| 8 | Was the follow up time reported and sufficient to be long enough for outcomes to occur? | NA* | NA* | NA* | NA* | Y | Y |
| 9 | Was follow up complete, and if not, were the reasons to loss to follow up described and explored? | NA* | NA* | NA* | NA* | N | N |
| 10 | Were strategies to address incomplete follow up utilized? | NA* | NA* | NA* | NA* | N | N |
| 11 | Was appropriate statistical analysis used? | Y | Y | Y | Y | Y | Y |
| **Score** | | 8/8 | 6/8 | 8/8 | 8/8 | 8/11 | 8/11 |
| **Overall appraisal (/: included, X: excluded)** | | / | / | / | / | / | / |

**Notes**: Prada et al.93 reported both retrospective cohort# and prospective cohort study##

* Follow-up aspects (items 8-10) are not applicable to a retrospective cohort study

** QUS measurement was conducted without DXA validation

Adapted from JBI. Critical appraisal tools; 2020. Available from: https://jbi.global/critical-appraisal-tools. Accessed February 18, 2021. Moola S, Munn Z, Tufanaru C, Aromataris E, Sears K, Sfetcu R, Currie M, Qureshi R, Mattis P, Lisy K, Mu P-F. Chapter 7: Systematic reviews of etiology and risk. In: Aromataris E, Munn Z (Editors). JBI Manual for Evidence Synthesis. JBI, 2020. Available from [https://synthesismanual.jbi.global](https://protect-us.mimecast.com/s/xY0-CZ6wWJf7Qr5N9SzhxQi?domain=synthesismanual.jbi.global). © JBI, 2020. All rights reserved.

**Abbreviations**: Y= Yes, N= No, NA= not applicable
